# Supplementary material for: Decoupled impact of acidity and mesoporosity on catalyst deactivation during glycerol dehydration over ZSM-5 zeolites
Source: Royal Society of Chemistry journal article supplement (doi:10.1039/d5nj03310a), 2025-01-01
Supplement: d5nj03310a1.pdf [file d5nj03310a1.pdf]

All data that support the findings of this study are provided in the manuscript and supplementary information (SI). Supplementary information: the catalytic performance of hierarchical zeolite; XRD, N<sub>2</sub> adsorption-desorption isotherms, SEM images, TEM images and NH<sub>3</sub>-TPD curves of hierarchical zeolites; the textural properties of microporous and hierarchical ZSM-5 zeolites; N<sub>2</sub> adsorption-desorption isotherms and the textural properties of spent microporous and hierarchical ZSM-5 zeolites.
